# Supplementary material for: Gender Differences in the Risk for Incident Non-Alcoholic Fatty Liver Disease According to the Transition of Abdominal Obesity Status: A 16-Year Cohort Study
Source: MDPI journal article supplement (doi:10.3390/nu15132880), 2023-06-25

## Supplementary materials

**Table S1. Definition of abdominal obesity status over time**

| <b>Baseline<br/>(2001-2002)</b> | <b>First follow-up<br/>(2003-2004)</b> | <b>Group</b> | <b>Label</b>                    |
|---------------------------------|----------------------------------------|--------------|---------------------------------|
| Normal                          | AO                                     | 1            | Persistent leanness             |
| AO                              | Normal                                 | 2            | Improved from abdominal obesity |
| Normal                          | AO                                     | 3            | Progressed to abdominal obesity |
| AO                              | AO                                     | 4            | Persistent abdominal obesity    |

**Table S2. Pairwise comparison p-value from unadjusted model and fully adjusted model over two-year follow-up**

|              |                                 | Unadjusted model |       |       |       |     | Fully adjusted model* |       |       |       |     |
|--------------|---------------------------------|------------------|-------|-------|-------|-----|-----------------------|-------|-------|-------|-----|
|              |                                 | HR (95% CI)      | (1)   | (2)   | (3)   | (4) | HR (95% CI)           | (1)   | (2)   | (3)   | (4) |
| <b>Total</b> | Persistent leanness             | ref              | ref   |       |       |     | ref                   | ref   |       |       |     |
|              | Improved from abdominal obesity | 1.39 (1.13-1.72) | 0.002 | ref   |       |     | 1.06 (0.84–1.33)      | 0.637 | ref   |       |     |
|              | Progressed to abdominal obesity | 2.26 (1.97-2.61) | <.001 | <.001 | ref   |     | 1.73 (1.48–2.02)      | <.001 | <.001 | ref   |     |
|              | Persistent abdominal obesity    | 2.56 (2.26-2.89) | <.001 | <.001 | 0.154 | ref | 1.33 (1.13–1.57)      | <.001 | 0.072 | 0.006 | ref |
| <b>Men</b>   | Persistent leanness             | ref              | ref   |       |       |     | ref                   | ref   |       |       |     |
|              | Improved from abdominal obesity | 1.91 (1.32-2.77) | 0.001 | ref   |       |     | 1.47 (0.99–2.18)      | 0.055 | ref   |       |     |
|              | Progressed to abdominal obesity | 2.25 (1.77-2.86) | <.001 | 0.457 | ref   |     | 1.60 (1.22–2.09)      | <.001 | 0.716 | ref   |     |
|              | Persistent abdominal obesity    | 2.78 (2.14-3.61) | <.001 | 0.094 | 0.211 | ref | 1.21 (0.87–1.69)      | 0.253 | 0.419 | 0.142 | ref |
| <b>Women</b> | Persistent leanness             | ref              | ref   |       |       |     | ref                   | ref   |       |       |     |
|              | Improved from abdominal obesity | 1.33 (1.03-1.73) | 0.029 | ref   |       |     | 0.93 (0.71–1.24)      | 0.628 | ref   |       |     |
|              | Progressed to abdominal obesity | 2.38 (2.00-2.84) | <.001 | <.001 | ref   |     | 1.78 (1.47–2.16)      | <.001 | <.001 | ref   |     |
|              | Persistent abdominal obesity    | 2.70 (2.33-3.12) | <.001 | <.001 | 0.215 | ref | 1.36 (1.12–1.65)      | 0.002 | 0.015 | 0.017 | ref |

\*Adjusted for age, sex (in total population), body mass index, smoking, physical activity, alcohol drinking, total energy intake, mean blood pressure, glycosylated hemoglobin, total cholesterol, high-sensitivity C-reactive protein, and alanine aminotransferase.

**Table S3. Cox proportional hazards regression analysis for incident non-alcoholic fatty liver disease according to abdominal obesity patterns**

|              |                                 | Unadjusted       |         | Model 1          |         | Model 2          |         | Model 3          |         |
|--------------|---------------------------------|------------------|---------|------------------|---------|------------------|---------|------------------|---------|
|              |                                 | HR (95% CI)      | p-value |
| <b>Total</b> | Persistent lean WC              | ref              |         | ref              |         | ref              |         | ref              |         |
|              | Improved abdominal obesity      | 1.48 (1.16–1.89) | 0.002   | 1.14 (0.88–1.46) | 0.323   | 1.16 (0.89–1.50) | 0.278   | 1.15 (0.89–1.50) | 0.292   |
|              | Progressed to abdominal obesity | 2.32 (2.00–2.70) | <.001   | 1.80 (1.54–2.11) | <.001   | 1.78 (1.51–2.10) | <.001   | 1.77 (1.50–2.09) | <.001   |
|              | Persistent abdominal obesity    | 2.44 (2.09–2.84) | <.001   | 1.30 (1.10–1.62) | 0.003   | 1.29 (1.05–1.59) | 0.015   | 1.33 (1.08–1.63) | 0.007   |
| <b>Men</b>   | Persistent lean WC              | ref              |         | ref              |         | ref              |         | ref              |         |
|              | Improved abdominal obesity      | 2.06 (1.35–3.13) | 0.001   | 1.37 (0.88–2.11) | 0.161   | 1.33 (0.85–2.08) | 0.217   | 1.33 (0.85–2.10) | 0.213   |
|              | Progressed to abdominal obesity | 1.96 (1.49–2.59) | <.001   | 1.46 (1.10–1.94) | 0.009   | 1.48 (1.10–2.00) | 0.011   | 1.50 (1.11–2.03) | 0.009   |
|              | Persistent abdominal obesity    | 2.23 (1.59–3.14) | <.001   | 1.08 (0.73–1.59) | 0.692   | 1.01 (0.67–1.52) | 0.973   | 1.10 (0.72–1.66) | 0.668   |
| <b>Women</b> | Persistent lean WC              | ref              |         | ref              |         | ref              |         | ref              |         |
|              | Improved abdominal obesity      | 1.45 (1.07–1.96) | 0.017   | 1.07 (0.79–1.46) | 0.652   | 1.07 (0.78–1.48) | 0.675   | 1.06 (0.77–1.47) | 0.716   |
|              | Progressed to abdominal obesity | 2.72 (2.26–3.28) | <.001   | 1.99 (1.64–2.42) | <.001   | 1.94 (1.59–2.38) | <.001   | 1.92 (1.57–2.35) | <.001   |
|              | Persistent abdominal obesity    | 2.78 (2.33–3.36) | <.001   | 1.42 (1.13–1.78) | 0.003   | 1.38 (1.08–1.77) | 0.010   | 1.41 (1.10–1.81) | 0.006   |

Model 1: adjusted for age, sex (in total population), and body mass index, Model 2: Model 1 plus smoking, physical activity, alcohol drinking, total energy intake. Model 3: Model 2 plus smoking, physical activity, alcohol drinking, total energy intake, mean blood pressure, glycosylated hemoglobin, total cholesterol, high-sensitivity C-reactive protein, and alanine aminotransferase.

Abbreviations: WC, waist circumference; HR, hazard ratio; CI, confidence interval.

**Table S4. Pairwise comparison p-value from unadjusted model and fully adjusted model during first four years of follow-up**

|              |                                 | Unadjusted model |       |       |       |     | Full adjusted model |       |       |       |     |
|--------------|---------------------------------|------------------|-------|-------|-------|-----|---------------------|-------|-------|-------|-----|
|              |                                 | HR (95% CI)      | (1)   | (2)   | (3)   | (4) | HR (95% CI)         | (1)   | (2)   | (3)   | (4) |
| <b>Total</b> | Persistent lean WC              | ref              | ref   |       |       |     | ref                 | ref   |       |       |     |
|              | Improved abdominal obesity      | 1.48(1.16–1.89)  | 0.002 | ref   |       |     | 1.15 (0.89–1.50)    | 0.292 | ref   |       |     |
|              | Progressed to abdominal obesity | 2.32(2.00–2.70)  | <.001 | 0.001 | ref   |     | 1.77 (1.50–2.09)    | <.001 | 0.003 | ref   |     |
|              | Persistent abdominal obesity    | 2.44(2.09–2.84)  | <.001 | <.001 | 0.627 | ref | 1.33 (1.08–1.63)    | 0.007 | 0.344 | 0.008 | ref |
| <b>Men</b>   | Persistent lean WC              | ref              | ref   |       |       |     | ref                 | ref   |       |       |     |
|              | Improved abdominal obesity      | 2.06(1.35–3.13)  | 0.001 | ref   |       |     | 1.33 (0.85–2.10)    | 0.213 | ref   |       |     |
|              | Progressed to abdominal obesity | 1.96(1.49–2.59)  | <.001 | 0.845 | ref   |     | 1.50 (1.11–2.03)    | 0.009 | 0.656 | ref   |     |
|              | Persistent abdominal obesity    | 2.23(1.59–3.14)  | <.001 | 0.759 | 0.541 | ref | 1.10 (0.72–1.66)    | 0.668 | 0.488 | 0.182 | ref |
| <b>Women</b> | Persistent lean WC              | ref              | ref   |       |       |     | ref                 | ref   |       |       |     |
|              | Improved abdominal obesity      | 1.45(1.07–1.96)  | 0.017 | ref   |       |     | 1.06 (0.77–1.47)    | 0.716 | ref   |       |     |
|              | Progressed to abdominal obesity | 2.72(2.26–3.28)  | <.001 | 0.001 | ref   |     | 1.92 (1.57–2.35)    | <.001 | <.001 | ref   |     |
|              | Persistent abdominal obesity    | 2.80(2.33–3.36)  | <.001 | <.001 | 0.804 | ref | 1.41 (1.10–1.81)    | 0.006 | 0.117 | 0.014 | ref |

\*Adjusted for age, sex (in total population), body mass index, smoking, physical activity, alcohol drinking, total energy intake, mean blood pressure, glycosylated hemoglobin, total cholesterol, high-sensitivity C-reactive protein, and alanine aminotransferase.

Abbreviations: WC, waist circumference; HR, hazard ratio; CI, confidence interval.

**Figure S1.** Cumulative incidence of NAFLD according to abdominal obesity patterns by setting the accrual time from baseline to second follow-up time. (A) Total, (B) Men, and (C) Women.

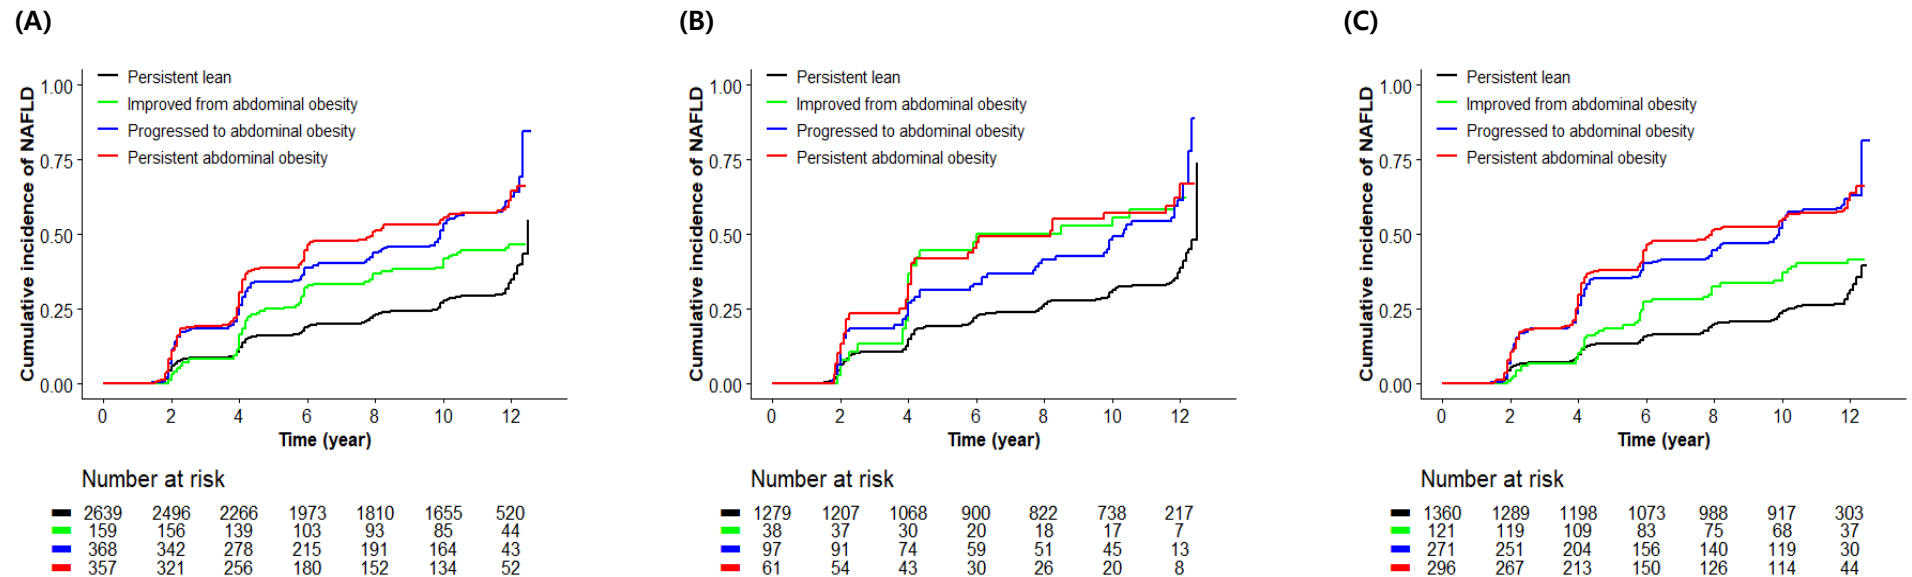

Supplement: s1 [file s1]
